# Supplementary material for: Osmolytes and CsAQP expression jointly influence water physiology in the peel and pulp of orange (Citrus sinensis (L.) Osbeck) fruit during postharvest water loss
Source: Frontiers journal article supplement (doi:10.3389/fpls.2024.1475574), 2024-10-21
Supplement: Image_1.pdf [file Image_1.pdf]

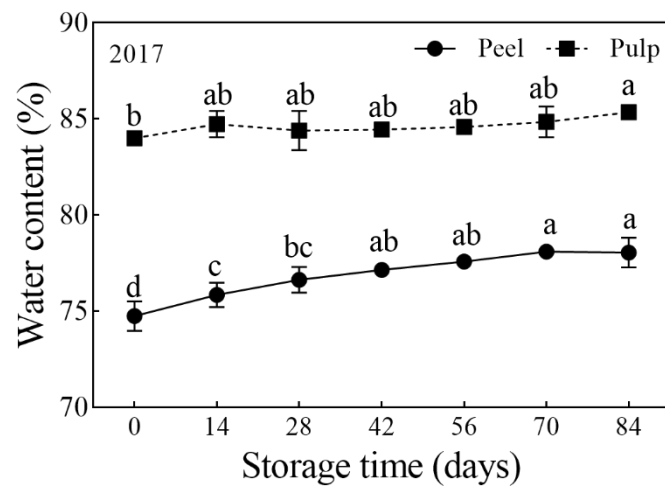

**Supplemental Figure 1 Changes of water content in peel and pulp of Newhall navel orange during storage in year of 2017-2018.** The values were presented as means  $\pm$  SD ( $n \geq 50$ ). Different lowercase letters mean significant differences in the same tissue at different storage times with  $P < 0.05$ .

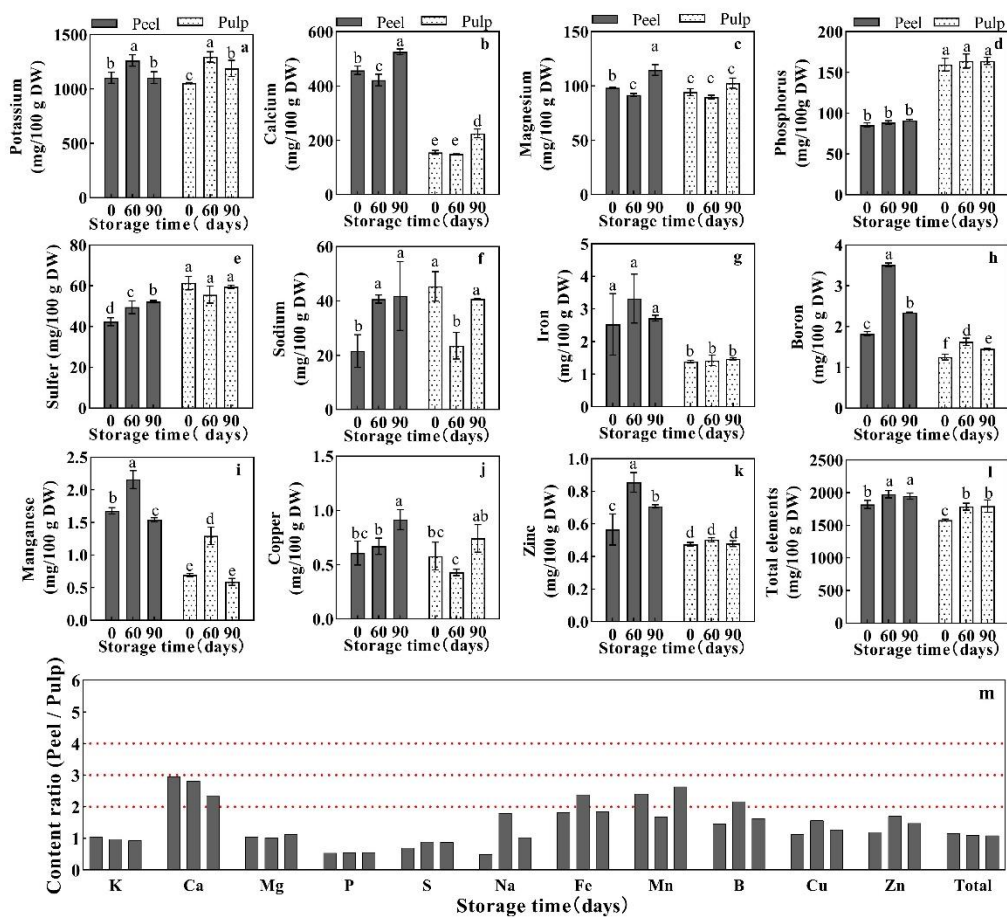

**Supplemental Figure 2.** Concentration of mineral elements in the peel and pulp of Newhall navel orange at 0 d, 60 d and 90 d post storage. (a) K, (b) Ca, (c) Mg, (d) P, (e) S and (f) Na, (g) Fe, (h) B, (i) Mn, (j) Cu, (k) Zn and (l) total element, and (m) the element concentration ratio of peel/pulp at the same storage period. The values were present as means  $\pm$  SD ( $n=3$ ). Different lowercase letters mean significant differences in the same tissue among different storage times with  $P < 0.05$ .
